# Supplementary material for: Application of neutral d10 coinage metal complexes with an anionic bidentate ligand in delayed fluorescence-type organic light-emitting diodes
Source: Royal Society of Chemistry journal article supplement (doi:10.1039/c3tc30524d), 2013-01-01
Supplement: c3tc30524d.pdf [file c3tc30524d.pdf]

## Supplementary Information

### Application of neutral $d^{10}$ coinage metal complexes with an anionic bidentate ligand in delayed fluorescence-type organic light-emitting diodes

Masahisa Osawa,<sup>\*,a</sup> Isao Kawata,<sup>a,c</sup> Ryuji Ishii,<sup>b</sup> Satoshi Igawa,<sup>a,b</sup> Masashi Hashimoto,<sup>a,b</sup> and Mikio Hoshino<sup>a</sup>

<sup>a</sup>*Luminescent Materials Laboratory, RIKEN, Hirosawa 2-1, Wako-Shi, 351-0198, Japan.*

<sup>b</sup>*Device Technology Development Headquarters, Ohta-ku, Tokyo 146-8501, Japan.*

<sup>c</sup>*Analysis Technology Center, Canon Incorporated, Ohta-ku, Tokyo 146-8501, Japan.*

#### Contents

| Experimental Details                                                                                                               | Page      |
|------------------------------------------------------------------------------------------------------------------------------------|-----------|
| 1. Synthetic Details                                                                                                               | S3 – S4   |
| 2. NMR Experiments                                                                                                                 | S5 – S8   |
| Fig. S1 <sup>1</sup> H NMR spectrum of <b>1</b> in CD <sub>2</sub> Cl <sub>2</sub> at 220 K.                                       |           |
| Fig. S2 <sup>31</sup> P { <sup>1</sup> H} NMR spectrum of <b>1</b> in CD <sub>2</sub> Cl <sub>2</sub> at 220 K.                    |           |
| Fig. S3 <sup>1</sup> H NMR spectrum of [Ag(μ-Br)(PP)] <sub>2</sub> in CD <sub>2</sub> Cl <sub>2</sub> at 300 K.                    |           |
| Fig. S4 <sup>31</sup> P { <sup>1</sup> H} NMR spectrum of [Ag(μ-Br)(PP)] <sub>2</sub> in CD <sub>2</sub> Cl <sub>2</sub> at 300 K. |           |
| Fig. S5 <sup>1</sup> H NMR spectrum of <b>2</b> in CDCl <sub>3</sub> at 300 K.                                                     |           |
| Fig. S6 <sup>31</sup> P { <sup>1</sup> H} NMR spectrum of <b>2</b> in CDCl <sub>3</sub> at 220 K.                                  |           |
| Fig. S7 <sup>1</sup> H NMR spectrum of <b>3</b> in CDCl <sub>3</sub> at 300 K.                                                     |           |
| Fig. S8 <sup>31</sup> P { <sup>1</sup> H} NMR spectrum of <b>3</b> in CDCl <sub>3</sub> at 300 K.                                  |           |
| 3. Crystal Structure Determination                                                                                                 | S9        |
| Table S1 Crystallographic data for <b>1–3</b>                                                                                      |           |
| 4. Theoretical Studies                                                                                                             | S10 – S15 |
| Table S2 Calculated energy differences between sublevels (M1, M2, and M3) in T <sub>1</sub> states for <b>1–3</b>                  |           |
| Table S3 Compositions of hole and electron in the S <sub>1</sub> state of <b>1</b> . (X-ray crystal structure)                     |           |
| Table S4 Compositions of hole and electron in the T <sub>1</sub> state of <b>1</b> . (X-ray crystal structure)                     |           |
| Fig. S9 NTO pairs for the lowest singlet excited state of <b>2</b> in X-ray crystal structure.                                     |           |
| Fig. S10 NTO pairs for the lowest triplet excited state of <b>2</b> in X-ray crystal structure.                                    |           |

Table S5 Compositions of hole and electron in the S<sub>1</sub> state of **2**. (X-ray crystal structure)  
Table S6 Compositions of hole and electron in the T<sub>1</sub> state of **2**. (X-ray crystal structure)  
Fig. S11 NTO pairs for the lowest singlet excited state of **3** in X-ray crystal structure.  
Fig. S12 NTO pairs for the lowest triplet excited state of **3** in X-ray crystal structure.  
Table S7 Compositions of hole and electron in the S<sub>1</sub> state of **3**. (X-ray crystal structure)  
Table S8 Compositions of hole and electron in the T<sub>1</sub> state of **3**. (X-ray crystal structure)  
Fig. S13 NTO pairs for the lowest triplet excited state of **1** in optimized S<sub>0</sub> geometry.  
Fig. S14 NTO pairs for the lowest singlet excited state of **1** in optimized T<sub>1</sub> geometry.  
Table S9 Compositions of hole and electron in the T<sub>1</sub> state of **1**. (optimized S<sub>0</sub> geometry)  
Table S10 Compositions of hole and electron in the S<sub>1</sub> state of **1**. (optimized T<sub>1</sub> geometry)

#### 5. Thermogravimetric Analysis

Fig. S15 TGA data for **1–3**. S16

#### 6. Cyclic Voltammetry Measurement

Fig. S16 Cyclic voltammogram of **1**. S16

#### 7. References

S17

## Experimental Details

### 1. Synthetic Details

**Materials.** 1,2-bis(diphenylphosphino)benzene (PP) and sodium hydride (60%, dispersion in paraffine liquid) were obtained from TCI. Co., Ltd. Silver bromide and poly(9-vinylcarbazole) (PVK) was purchased from Sigma-Aldrich. PEDOT: PSS (CLEVIOS™ P VP CH 8000) was obtained from Heraeus Clevios GmbH. 4,4'-bis(9-carbazolyl)-2,2'-dimethyl-biphenyl (CDBP), Di-[4-(N,N-ditolyl-amino)-phenyl]cyclohexane (TAPC), 1,3-bis(carbazol-9-yl)benzene (mCP), and tris(2,4,6-trimethyl-3-(pyridine-3-yl)phenyl)borane (3TPYMB) were purchased from Lumitec Corp. xylene (EL grade) was obtained from Kanto Chemical Co., Inc. 2-Diphenylphosphinobenzenethiol (PSH),<sup>1</sup> [Cu( $\mu$ -Br)(PP)]<sub>2</sub>,<sup>2</sup> and Au(PPh<sub>3</sub>)Cl<sup>3</sup> were prepared according to the literature.

**[Cu(PP)(PS)] (1).** A tetrahydrofuran (10 ml) solution of 2-diphenylphosphinobenzenethiol, sodium salt (PSNa) was prepared from sodium hydride (10 mg, 0.42 mmol) and 2-diphenylphosphinobenzenethiol (120 mg, 0.41 mmol). The solution of PSNa was added to a THF (20 ml) solution of [Cu( $\mu$ -Br)(PP)]<sub>2</sub> (230 mg, 0.20 mmol) and was stirred for 2 h at room temperature. After filtration of the reaction mixture, the solvent was removed in vacuo to give a pale yellow powder. The residue was purified by recrystallization from CH<sub>2</sub>Cl<sub>2</sub> / acetone to give yellow crystals Cu(PP)(PS) (**1**) (223 mg, 73%). <sup>1</sup>H NMR (400 MHz, CD<sub>2</sub>Cl<sub>2</sub>, 220 K):  $\delta$  6.65 (m, 4H), 6.70 (t, 1H,  $J$  = 7.4 Hz), 6.82 (t, 4H,  $J$  = 7.6 Hz), 6.93 (t, 4H,  $J$  = 7.5 Hz), 7.10 (m, 7H), 7.29 (m, 16H), 7.47 (m, 4H), 7.55 (m, 1H); <sup>31</sup>P {<sup>1</sup>H} NMR (162 MHz, CD<sub>2</sub>Cl<sub>2</sub>, 220 K)  $\delta$  10.1 (s, br), 2.67 (s, br). Anal. calcd. for C<sub>48</sub>H<sub>38</sub>CuP<sub>3</sub>S (%): C, 71.76; H, 4.77. Found: C, 71.55; H, 5.03.

**[Ag( $\mu$ -Br)(PP)]<sub>2</sub>.** A round battle flask was charged with AgBr (90mg, 0.48 mmol), PP (200 mg, 0.45 mmol) in 30 ml of CH<sub>2</sub>Cl<sub>2</sub>. After the mixture was stirred for 12 h at room temperature in the dark. Then, the reaction mixture was filtrated, and the solvent was removed in vacuo to give a white powder. A colorless crystalline sample was obtained by diffusion of ether on the surface of the CH<sub>2</sub>Cl<sub>2</sub> solution dissolving [Ag( $\mu$ -Br)(PP)]<sub>2</sub>. Yield: 251 mg, 88%. <sup>1</sup>H NMR (400 MHz, CD<sub>2</sub>Cl<sub>2</sub>, 300 K)  $\delta$  7.54 (m, 4H), 7.25 (m, 20H); <sup>31</sup>P {<sup>1</sup>H} NMR (162 MHz, CD<sub>2</sub>Cl<sub>2</sub>, 300 K)  $\delta$  -4.26 (br). Anal. Calcd for C<sub>60</sub>H<sub>48</sub>Ag<sub>2</sub>Br<sub>2</sub>P<sub>4</sub>: C, 56.81; H, 3.81. Found C, 57.02; H, 3.59.

**[Ag(PP)(PS)] (2).** This compound was prepared similarly to Cu(PP)(PS) (**1**), except that the [Ag( $\mu$ -Br)(PP)]<sub>2</sub> (241 mg, 0.19 mmol) was used instead of [Cu( $\mu$ -Br)(PP)]<sub>2</sub>. Analytically pure material was obtained by recrystallization from THF. Yield: 184 mg, 57%. <sup>1</sup>H NMR (400 MHz, CD<sub>2</sub>Cl<sub>2</sub>, 300 K):  $\delta$  6.70 (t, 1H,  $J$  = 7.7 Hz), 6.94 (m, 2H), 7.17 (m, 12H), 7.31 (m, 22H), 7.70 (t,

1H,  $J = 7.0$  Hz);  $^{31}\text{P}$  { $^1\text{H}$ } NMR (162 MHz,  $\text{CDCl}_3$ , 220 K)  $\delta$  3.53 (dt,  $^1J(^{31}\text{P}-^{107}\text{Ag}) = 288$  Hz,  $^1J(^{31}\text{P}-^{109}\text{Ag}) = 333$  Hz,  $^2J(^{31}\text{P}-^{31}\text{P}) = 34$  Hz), -7.01 (dd,  $^1J(^{31}\text{P}-^{107}\text{Ag}) = 223$  Hz,  $^1J(^{31}\text{P}-^{109}\text{Ag}) = 258$  Hz,  $^2J(^{31}\text{P}-^{31}\text{P}) = 34$  Hz). Anal. calcd. for  $\text{C}_{48}\text{H}_{38}\text{AgP}_3\text{S}$  (%): C, 68.01; H, 4.52. Found: C, 67.80; H, 4.34.

**[Au(PP)(PS)] (3).** Au( $\text{PPh}_3$ )Cl (100 mg, 0.20 mmol) and PSH (60 mg, 0.20 mmol) were stirred for 10 min in a mixed solvent (5 ml of THF and 5 ml of ether). The color of solution immediately turned from colorlessness to yellow. A solution (4 ml of THF and 8 ml of ether) of PP (100 mg, 0.20 mmol) was added to the yellow reaction mixture slowly and then yellow microcrystals of Au(PP)(PS) **3** were deposited instantly. The yellow crystals of **3** were isolated by filtration. Yield: 99 mg, 53%.  $^1\text{H}$  NMR (400 MHz,  $\text{CD}_2\text{Cl}_2$ , 300 K):  $\delta$  6.70 (t, 1H,  $J = 7.7$  Hz), 6.92 (t, 1H,  $J = 7.7$  Hz), 7.00 (t, 1H,  $J = 7.4$  Hz), 7.07 (t, 4H,  $J = 7.0$  Hz), 7.30 (m, 28H), 7.56 (m, 2H), 7.70 (t, 1H,  $J = 7.0$  Hz);  $^{31}\text{P}$  { $^1\text{H}$ } NMR (162 MHz,  $\text{CD}_2\text{Cl}_2$ , 300 K)  $\delta$  26.3 (t,  $J(^{31}\text{P}-^{31}\text{P}) = 83.9$  Hz), 18.3 (d,  $J(^{31}\text{P}-^{31}\text{P}) = 83.9$  Hz). Anal. calcd. for  $\text{C}_{48}\text{H}_{38}\text{AuP}_3\text{S}$  (%): C, 61.54; H, 4.09. Found: C, 61.36; H, 4.21.

## 2. NMR Experiments

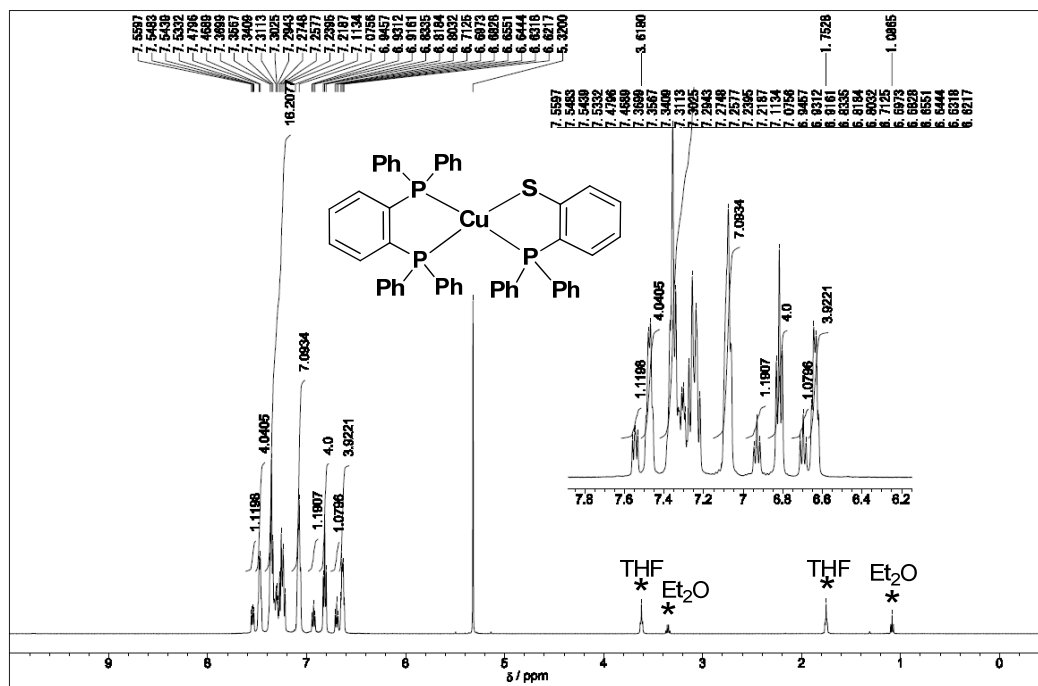

Fig. S1  $^1\text{H}$  NMR spectrum of **1** in  $\text{CD}_2\text{Cl}_2$  at 220 K.

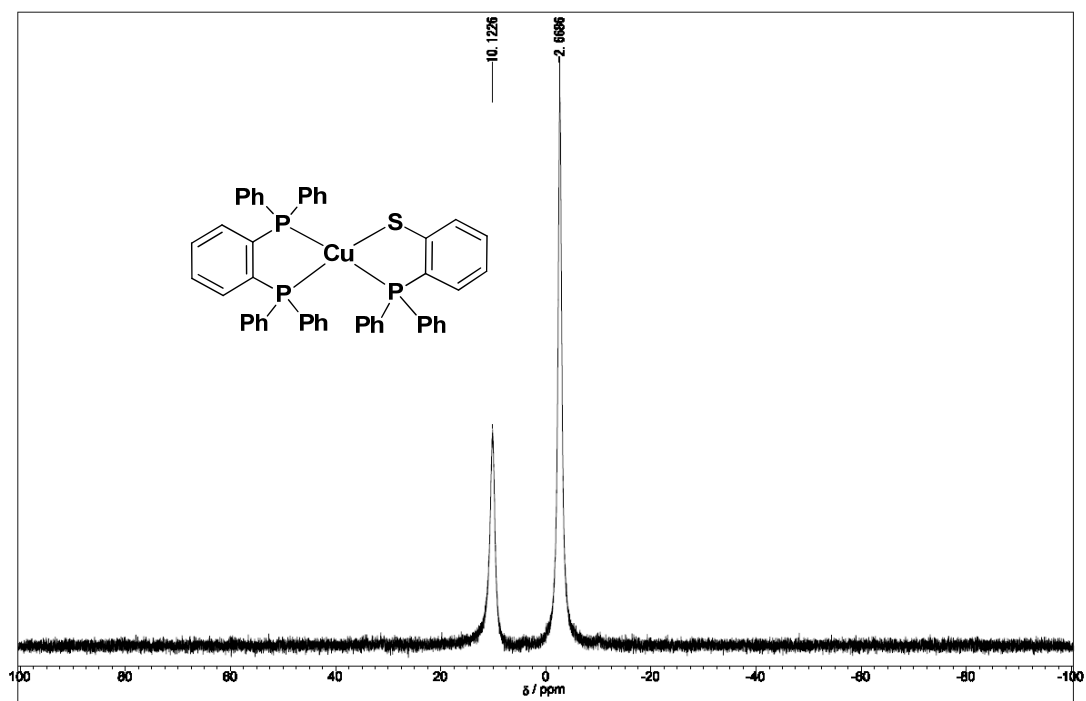

Fig. S2  $^{31}\text{P}$   $\{^1\text{H}\}$  NMR spectrum of **1** in  $\text{CD}_2\text{Cl}_2$  at 220 K.

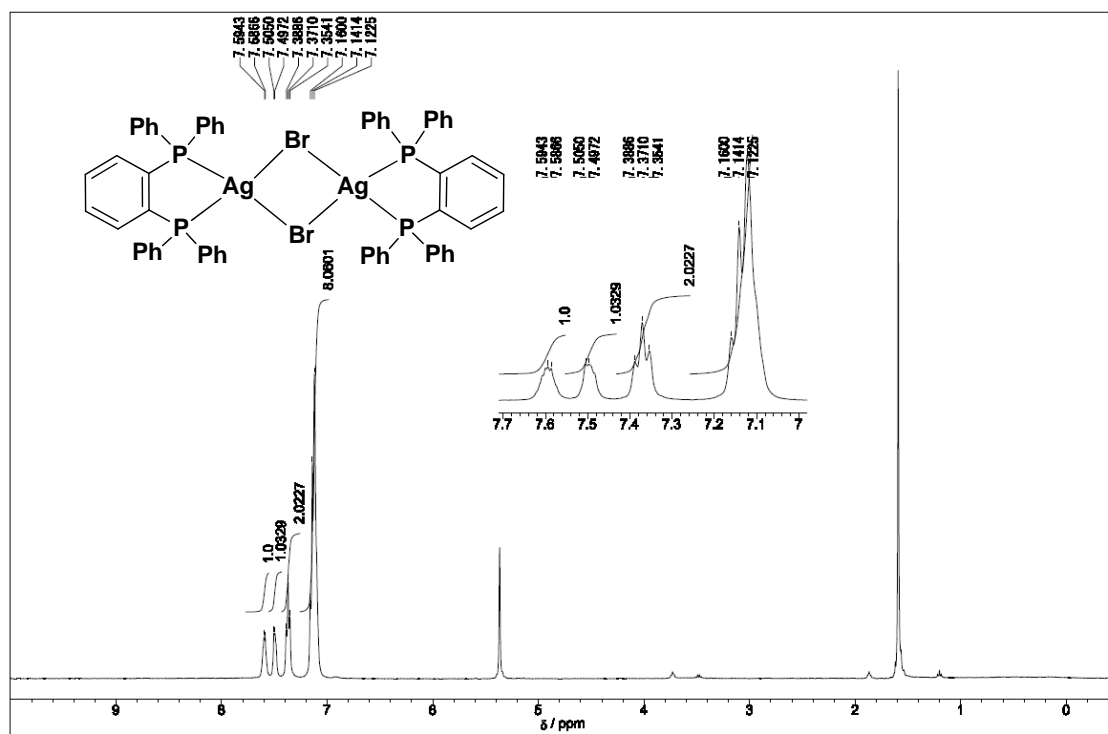

Fig. S3  $^1\text{H}$  NMR spectrum of  $[\text{Ag}(\mu\text{-Br})(\text{PP})_2]$  in  $\text{CD}_2\text{Cl}_2$  at 300 K.

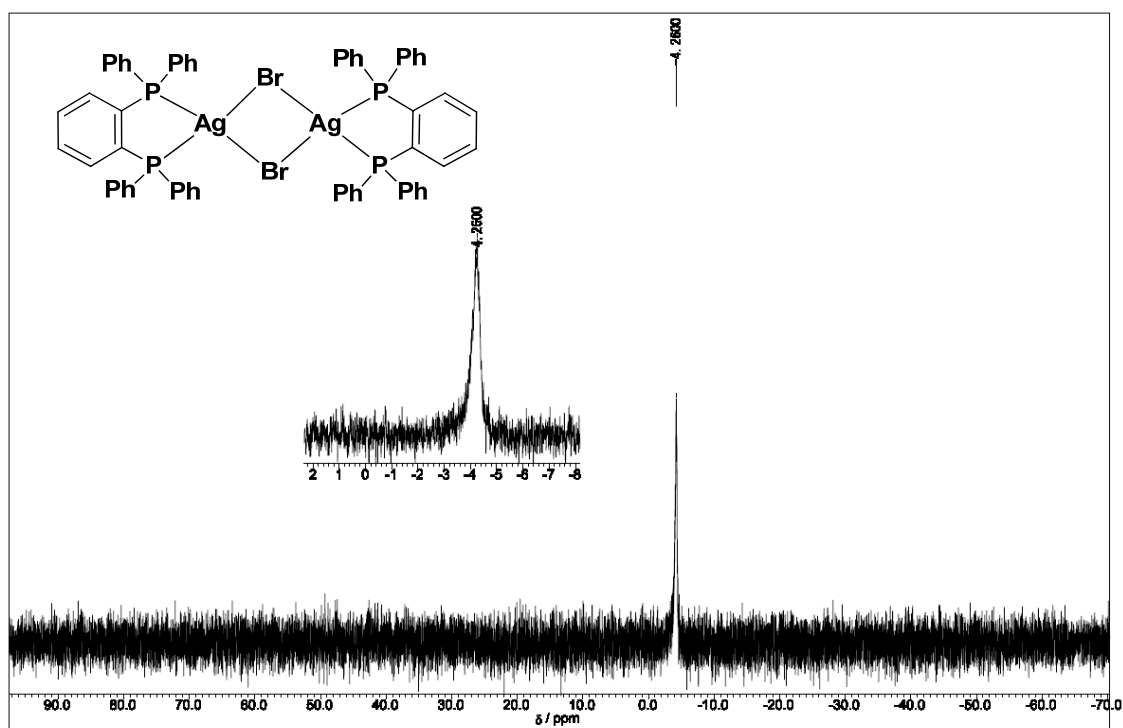

Fig. S4  $^{31}\text{P}$   $\{^1\text{H}\}$  NMR spectrum of  $[\text{Ag}(\mu\text{-Br})(\text{PP})_2]$  in  $\text{CD}_2\text{Cl}_2$  at 300 K.

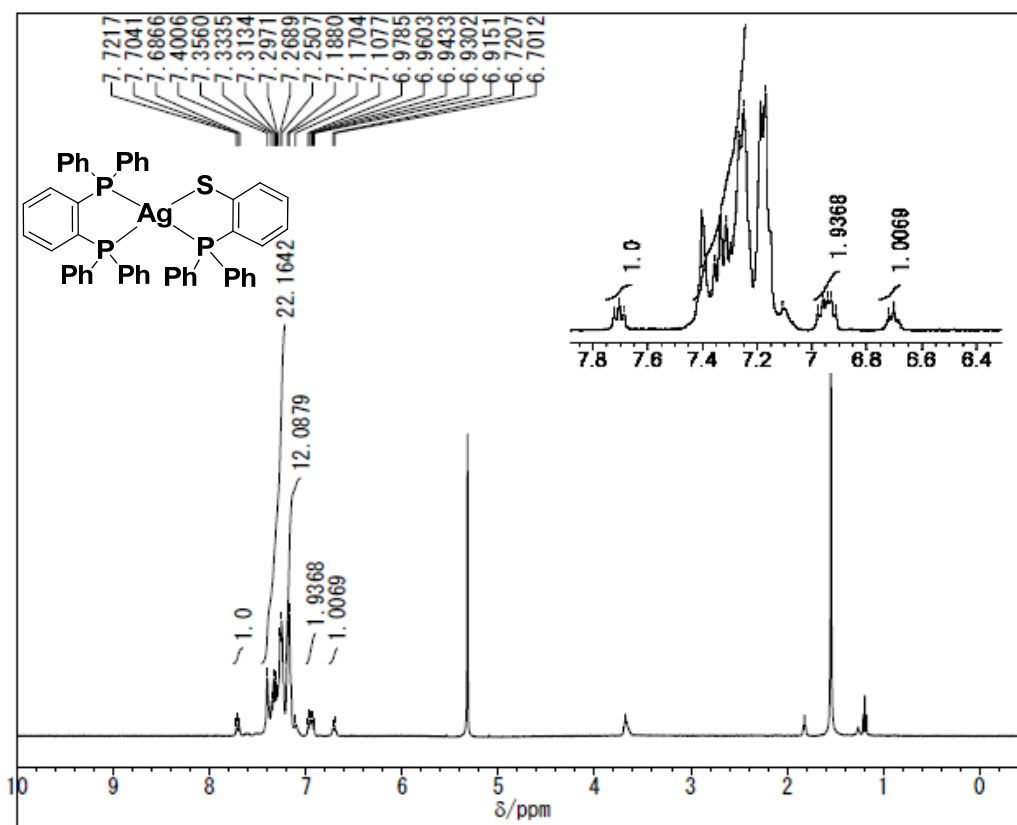

Fig. S5 <sup>1</sup>H NMR spectrum of **2** in CDCl<sub>3</sub> at 300 K.

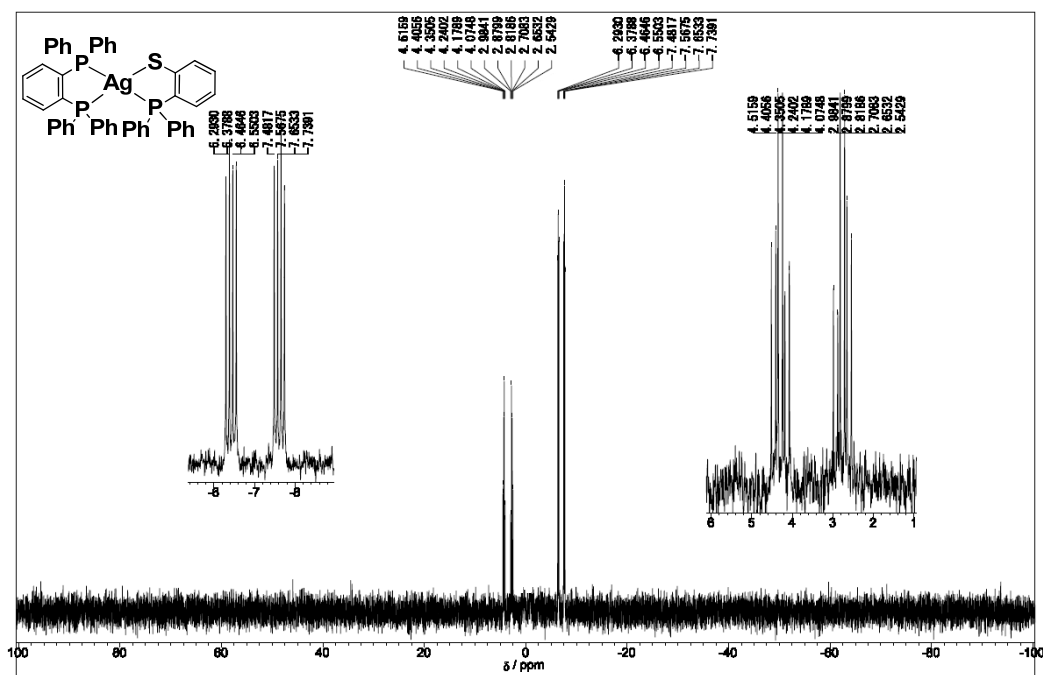

Fig. S6 <sup>31</sup>P {<sup>1</sup>H} NMR spectrum of **2** in CDCl<sub>3</sub> at 220 K.

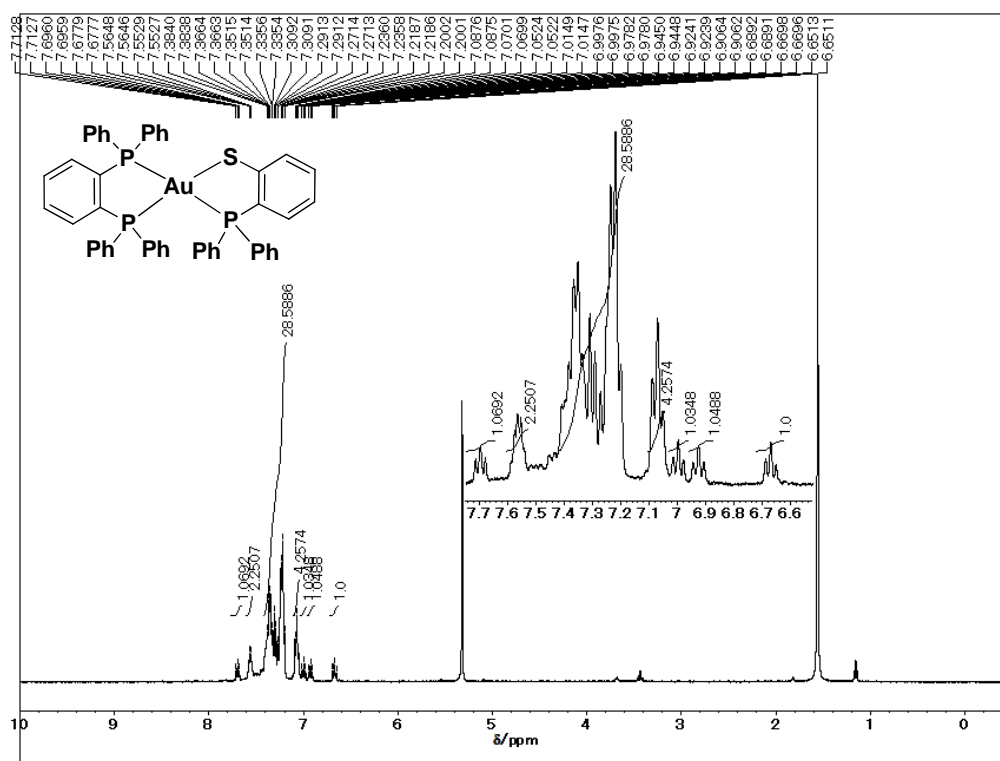

Fig. S7  $^1\text{H}$  NMR spectrum of **1** in  $\text{CD}_2\text{Cl}_2$  at 300 K.

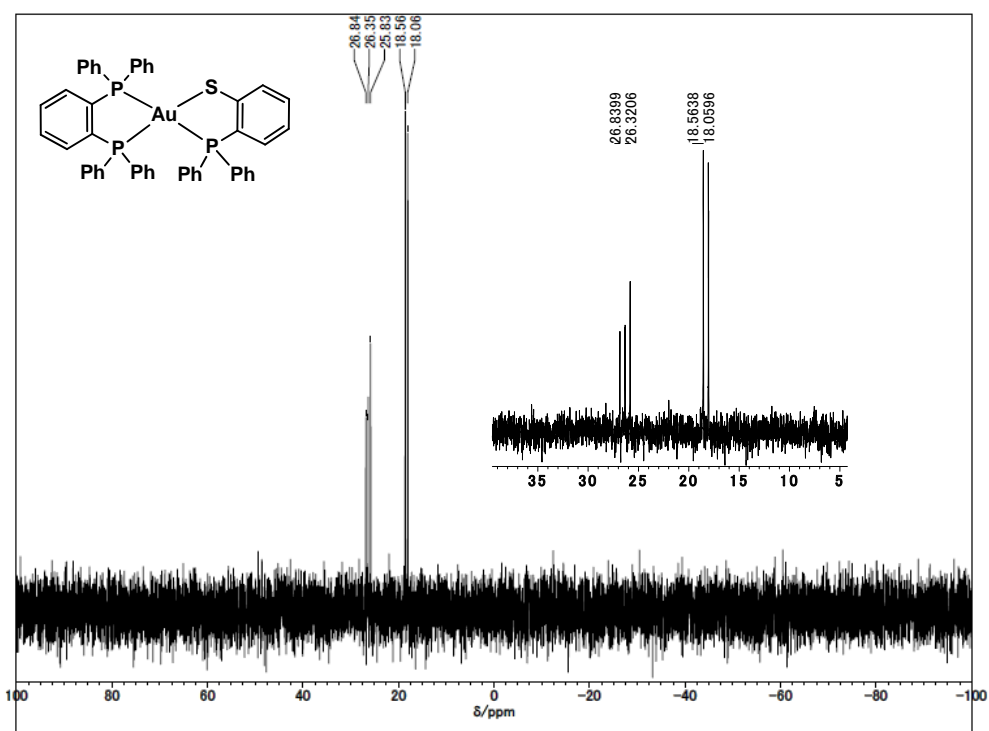

Fig. S8  $^{31}\text{P}$   $\{^1\text{H}\}$  NMR spectrum of **1** in  $\text{CD}_2\text{Cl}_2$  at 300 K.



### 3. Crystal Structure Determination

**Table S1** Crystallographic data for **1–3**

|                                                           | <b>1</b>                                            | <b>2</b>                                           | <b>3</b>                                           |
|-----------------------------------------------------------|-----------------------------------------------------|----------------------------------------------------|----------------------------------------------------|
| formula                                                   | C <sub>48</sub> H <sub>38</sub> BCuP <sub>3</sub> S | C <sub>48</sub> H <sub>38</sub> AgP <sub>3</sub> S | C <sub>48</sub> H <sub>38</sub> AuP <sub>3</sub> S |
| formula weight                                            | 803.29                                              | 847.62                                             | 936.72                                             |
| cryst syst                                                | triclinic                                           | triclinic                                          | triclinic                                          |
| space group                                               | <i>P</i> $\bar{1}$                                  | <i>P</i> $\bar{1}$                                 | <i>P</i> $\bar{1}$                                 |
| <i>a</i> / Å                                              | 10.9321 (11)                                        | 10.8301 (6)                                        | 10.8554 (18)                                       |
| <i>b</i> / Å                                              | 17.2890 (14)                                        | 12.0774 (6)                                        | 12.0178 (18)                                       |
| <i>c</i> / Å                                              | 21.859 (2)                                          | 15.8880 (9)                                        | 15.617 (2)                                         |
| $\alpha$ / deg                                            | 74.282 (5)                                          | 72.281 (2)                                         | 73.052 (6)                                         |
| $\beta$ / deg                                             | 80.472 (5)                                          | 88.762 (2)                                         | 88.148 (9)                                         |
| $\gamma$ / deg                                            | 82.288 (6)                                          | 81.290 (3)                                         | 80.401 (7)                                         |
| <i>V</i> / Å <sup>3</sup>                                 | 3904.8 (6)                                          | 1956.06 (18)                                       | 1921.3 (5)                                         |
| <i>Z</i>                                                  | 4                                                   | 2                                                  | 2                                                  |
| <i>d</i> <sub>calcd</sub> / g cm <sup>-3</sup>            | 1.366                                               | 1.439                                              | 1.619                                              |
| <i>T</i> / K                                              | 90.0(1)                                             | 90.0(1)                                            | 90.0(1)                                            |
| radiation                                                 | Mo K $\alpha$                                       | Mo K $\alpha$                                      | Mo K $\alpha$                                      |
|                                                           | ( $\lambda$ = 0.71073 Å)                            | ( $\lambda$ = 0.71073 Å)                           | ( $\lambda$ = 0.71073 Å)                           |
| $\mu$ / cm <sup>-1</sup>                                  | 0.770                                               | 0.675                                              | 4.043                                              |
| diffractometer                                            | Rigaku AFC-8                                        | Rigaku AFC-8                                       | Rigaku AFC-8                                       |
| max 2 $\theta$ / deg                                      | 60                                                  | 55                                                 | 60                                                 |
| reflns collcd                                             | 102460                                              | 29243                                              | 20603                                              |
| indep reflns                                              | 22754                                               | 19205                                              | 11101                                              |
|                                                           | ( <i>R</i> <sub>int</sub> = 0.079)                  | ( <i>R</i> <sub>int</sub> = 0.056)                 | ( <i>R</i> <sub>int</sub> = 0.040)                 |
| no. of param refined                                      | 955                                                 | 479                                                | 479                                                |
| <i>RI</i> , <i>wR2</i> ( <i>I</i> > 2 $\sigma$ <i>I</i> ) | 0.0723, 0.1604                                      | 0.0433, 0.1031                                     | 0.0491, 0.0832                                     |
| <i>S</i>                                                  | 1.098                                               | 1.050                                              | 1.076                                              |

#### 4. Theoretical Studies

**Table S2** Calculated energy differences between sublevels (M1, M2, and M3) in T<sub>1</sub> states for **1**  
– 3

| energy level <sup>a</sup> | 1       | 2       | 3       |
|---------------------------|---------|---------|---------|
| M1                        | 20769.9 | 19828.8 | 19900.4 |
| M2                        | 20760.9 | 19828.8 | 19900.6 |
| M3                        | 20760.9 | 19828.8 | 19904.3 |

<sup>a</sup> cm<sup>-1</sup>

**Table S3** Compositions of hole and electron in S<sub>1</sub> of **1**. (X-ray crystal structure)

|        | percentage composition (%) <sup>a</sup> |          |             |
|--------|-----------------------------------------|----------|-------------|
|        | hole                                    | electron | differences |
| Cu     | 5.27                                    | 0.65     | 4.62        |
| S      | 59.4                                    | 0.08     | 59.3        |
| P      | 3.82                                    | 1.48     | 2.34        |
| P      | 2.52                                    | 4.37     | -1.85       |
| P      | 0.19                                    | 0.27     | -0.08       |
| others | 27.1                                    | 93.1     | -66.0       |

<sup>a</sup> In the molecular orbitals, the atomic component is evaluated by the sum of the square of the LCAO coefficients which belong to the corresponding atom; see experimental section in detail.

**Table S4** Compositions of hole and electron in  $T_1$  of **1**. (X-ray crystal structure)

|        | percentage composition (%) <sup>a</sup> |          |             |
|--------|-----------------------------------------|----------|-------------|
|        | hole                                    | electron | differences |
| Cu     | 5.44                                    | 0.72     | 4.72        |
| S      | 58.5                                    | 0.09     | 58.4        |
| P      | 4.04                                    | 1.49     | 2.55        |
| P      | 2.77                                    | 4.43     | -1.66       |
| P      | 0.21                                    | 0.29     | -0.08       |
| others | 29.1                                    | 93.0     | -66.0       |

<sup>a</sup> In the molecular orbitals, the atomic component is evaluated by the sum of the square of the LCAO coefficients which belong to the corresponding atom; see experimental section in detail.

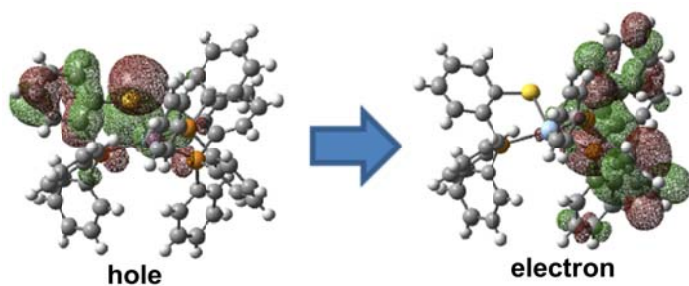

**Fig. S9** NTO pairs for the lowest singlet excited state of **2** in X-ray crystal structure.

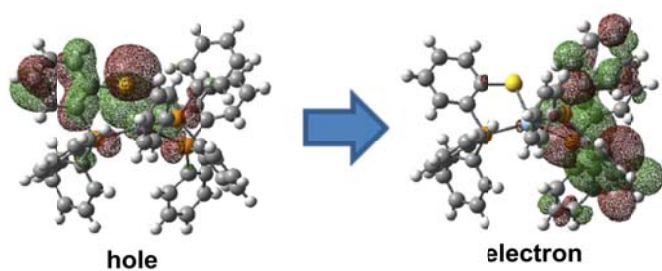

**Fig. S10** NTO pairs for the lowest triplet excited state of **2** in X-ray crystal structure.

**Table S5** Compositions of hole and electron in S<sub>1</sub> of **2**. (X-ray crystal structure)

|        | percentage composition (%) <sup>a</sup> |          |             |
|--------|-----------------------------------------|----------|-------------|
|        | hole                                    | electron | differences |
| Ag     | 2.47                                    | 0.52     | 1.95        |
| S      | 62.4                                    | 0.04     | 62.4        |
| P      | 1.87                                    | 3.87     | -2.00       |
| P      | 0.93                                    | 1.01     | -0.08       |
| P      | 1.27                                    | 0.27     | 1.00        |
| others | 31.0                                    | 94.3     | -63.3       |

<sup>a</sup> In the molecular orbitals, the atomic component is evaluated by the sum of the square of the LCAO coefficients which belong to the corresponding atom; see experimental section in detail.

**Table S6** Compositions of hole and electron in T<sub>1</sub> of **2**. (X-ray crystal structure)

|        | percentage composition (%) <sup>a</sup> |          |             |
|--------|-----------------------------------------|----------|-------------|
|        | hole                                    | electron | differences |
| Cu     | 2.55                                    | 0.55     | 2.00        |
| S      | 61.8                                    | 0.06     | 61.2        |
| P      | 2.05                                    | 3.88     | -1.83       |
| P      | 1.14                                    | 1.00     | 0.14        |
| P      | 1.27                                    | 0.30     | 0.97        |
| others | 31.2                                    | 94.2     | -63.0       |

<sup>a</sup> In the molecular orbitals, the atomic component is evaluated by the sum of the square of the LCAO coefficients which belong to the corresponding atom; see experimental section in detail.

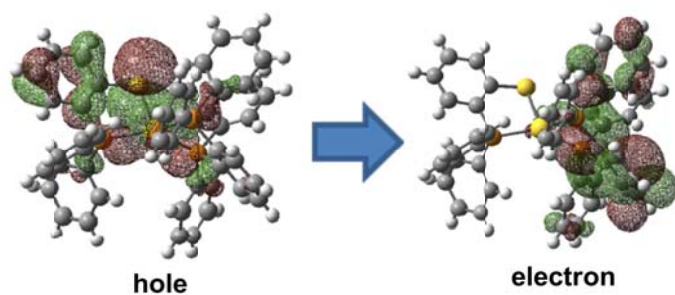

**Fig. S11** NTO pairs for the lowest singlet excited state of **3** in X-ray crystal structure.

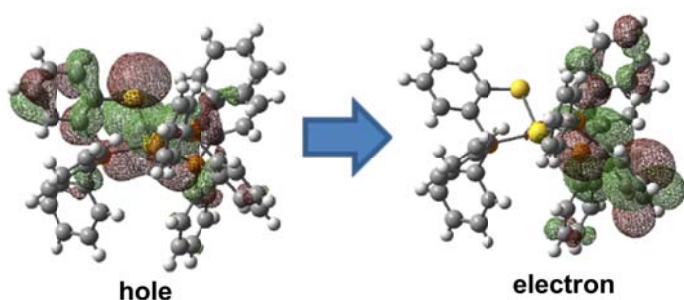

**Fig. S12** NTO pairs for the lowest triplet excited state of **3** in X-ray crystal structure.

**Table S7** Compositions of hole and electron in the  $S_1$  state of **3**. (X-ray crystal structure)

|        | percentage composition (%) <sup>a</sup> |          |             |
|--------|-----------------------------------------|----------|-------------|
|        | hole                                    | electron | differences |
| Au     | 5.96                                    | 0.54     | 5.42        |
| S      | 56.4                                    | 0.04     | 56.4        |
| P      | 4.60                                    | 2.77     | 1.83        |
| P      | 3.46                                    | 1.48     | 1.98        |
| P      | 2.35                                    | 0.36     | 1.99        |
| others | 27.2                                    | 94.8     | -67.6       |

<sup>a</sup> In the molecular orbitals, the atomic component is evaluated by the sum of the square of the LCAO coefficients which belong to the corresponding atom; see experimental section in detail.

**Table S8** Compositions of hole and electron in the  $T_1$  state of **3**. (X-ray crystal structure)

|        | percentage composition (%) <sup>a</sup> |          |             |
|--------|-----------------------------------------|----------|-------------|
|        | hole                                    | electron | differences |
| Au     | 6.20                                    | 0.55     | 5.65        |
| S      | 55.4                                    | 0.05     | 55.4        |
| P      | 4.86                                    | 2.77     | 2.09        |
| P      | 3.82                                    | 1.47     | 2.35        |
| P      | 2.39                                    | 0.37     | 2.02        |
| others | 27.3                                    | 94.8     | -67.5       |

<sup>a</sup> In the molecular orbitals, the atomic component is evaluated by the sum of the square of the LCAO coefficients which belong to the corresponding atom; see experimental section in detail.

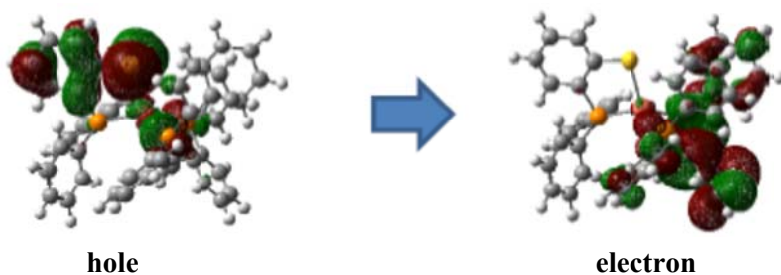

**Fig. S13** NTO pairs for the lowest triplet excited state of **1** in optimized  $S_0$  geometry. The generation probabilities are 99.6 %.

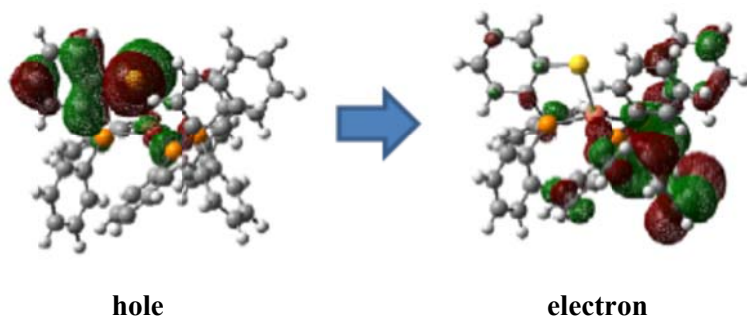

**Fig. S14** NTO pairs for the lowest singlet excited state of **1** in optimized  $T_1$  geometry. The generation probabilities are 99.9 %.

**Table S9** Compositions of hole and electron in the T<sub>1</sub> state of **1** (optimized S<sub>0</sub> geometry).

|        | percentage composition (%) <sup>a</sup> |          |             |
|--------|-----------------------------------------|----------|-------------|
|        | hole                                    | electron | differences |
| Cu     | 4.86                                    | 0.35     | 4.51        |
| S      | 63.3                                    | 0.06     | 63.2        |
| P      | 2.47                                    | 1.44     | 1.03        |
| P      | 1.76                                    | 3.74     | -1.98       |
| P      | 0.09                                    | 0.23     | -0.14       |
| others | 28.2                                    | 94.2     | -66.0       |

<sup>a</sup> In the molecular orbitals, the atomic component is evaluated by the sum of the square of the LCAO coefficients which belong to the corresponding atom; see experimental section in detail.

**Table S10** Compositions of hole and electron in the S<sub>1</sub> state of **1** (optimized T<sub>1</sub> geometry).

|        | percentage composition (%) <sup>a</sup> |          |             |
|--------|-----------------------------------------|----------|-------------|
|        | hole                                    | electron | differences |
| Cu     | 3.20                                    | 0.32     | 2.88        |
| S      | 62.7                                    | 0.04     | 62.7        |
| P      | 13.8                                    | 1.54     | 12.3        |
| P      | 1.02                                    | 3.28     | -2.26       |
| P      | 0.25                                    | 0.43     | -0.18       |
| others | 19.0                                    | 95.4     | -76.4       |

<sup>a</sup> In the molecular orbitals, the atomic component is evaluated by the sum of the square of the LCAO coefficients which belong to the corresponding atom; see experimental section in detail.

## 5. Thermogravimetric Analysis

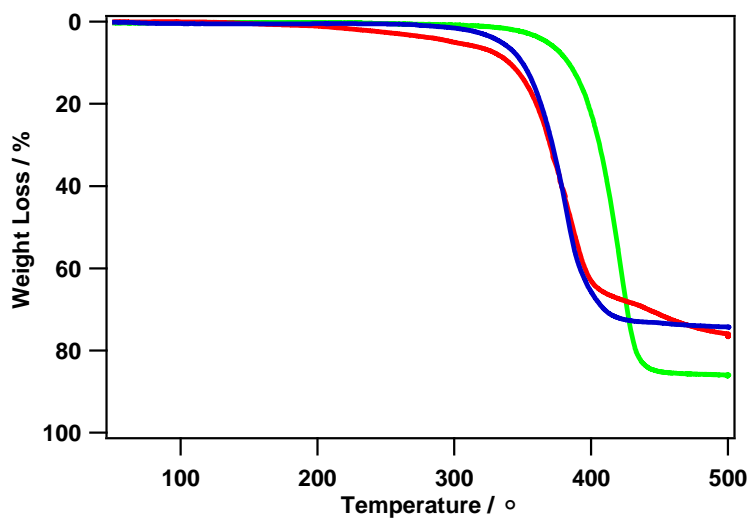

Fig. S15 TGA data for 1 (green), 2 (blue), and 3 (red).

## 6. Cyclic Voltammetry

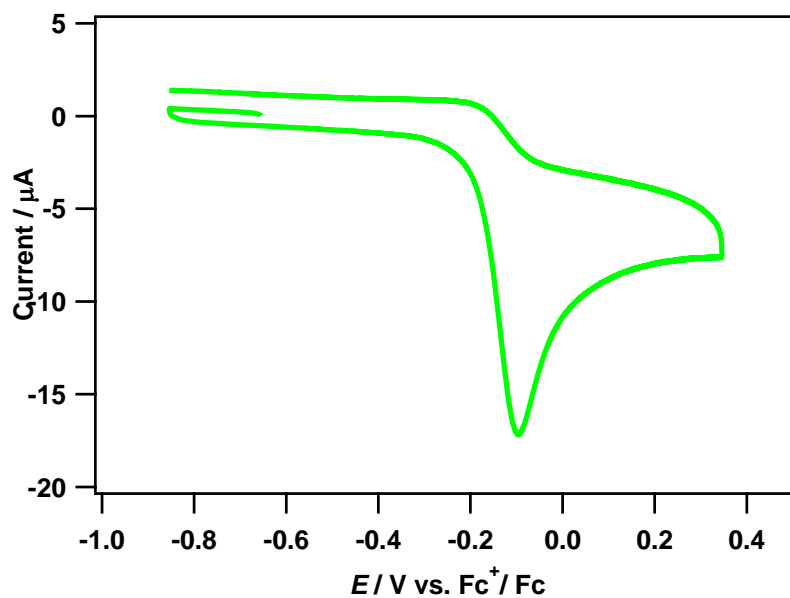

Fig. S16 Cyclic voltammetry of 1.



## 7. References

1. E. Block, G. Ofori-Okai and J. Zubieta, *J. Am. Chem. Soc.*, 1989, **111**, 2327-2329.
2. A. Tsuboyama, K. Kuge, M. Furugori, S. Okada, M. Hoshino and K. Ueno, *Inorganic Chemistry*, 2007, **46**, 1992-2001.
3. N. Mezailles, L. Ricard and F. Gagosz, *Org. Lett.*, 2005, **7**, 4133-4136.
